# Supplementary material for: A polymorphic AT-repeat causes frequent allele dropout for an MME mutational hotspot exon
Source: HighWire-hosted journal article supplement (doi:10.1136/jmedgenet-2021-108281), 2022-03-22

## Supplementary figure and tables

### MME reference sequence and primers.

Reference sequence and numbering is according to *MME* ENSG00000196549. Exon numbering and variant position is according to *MME* NM\_007289.3.

Exons are indicated in light blue, AT-repeat, c.439+33\_439+48AT[8-15], in orange and the two *MME* mutations c.440-2A>C and c.467del in red. Primers used are indicated with black arrows and primer numbering.

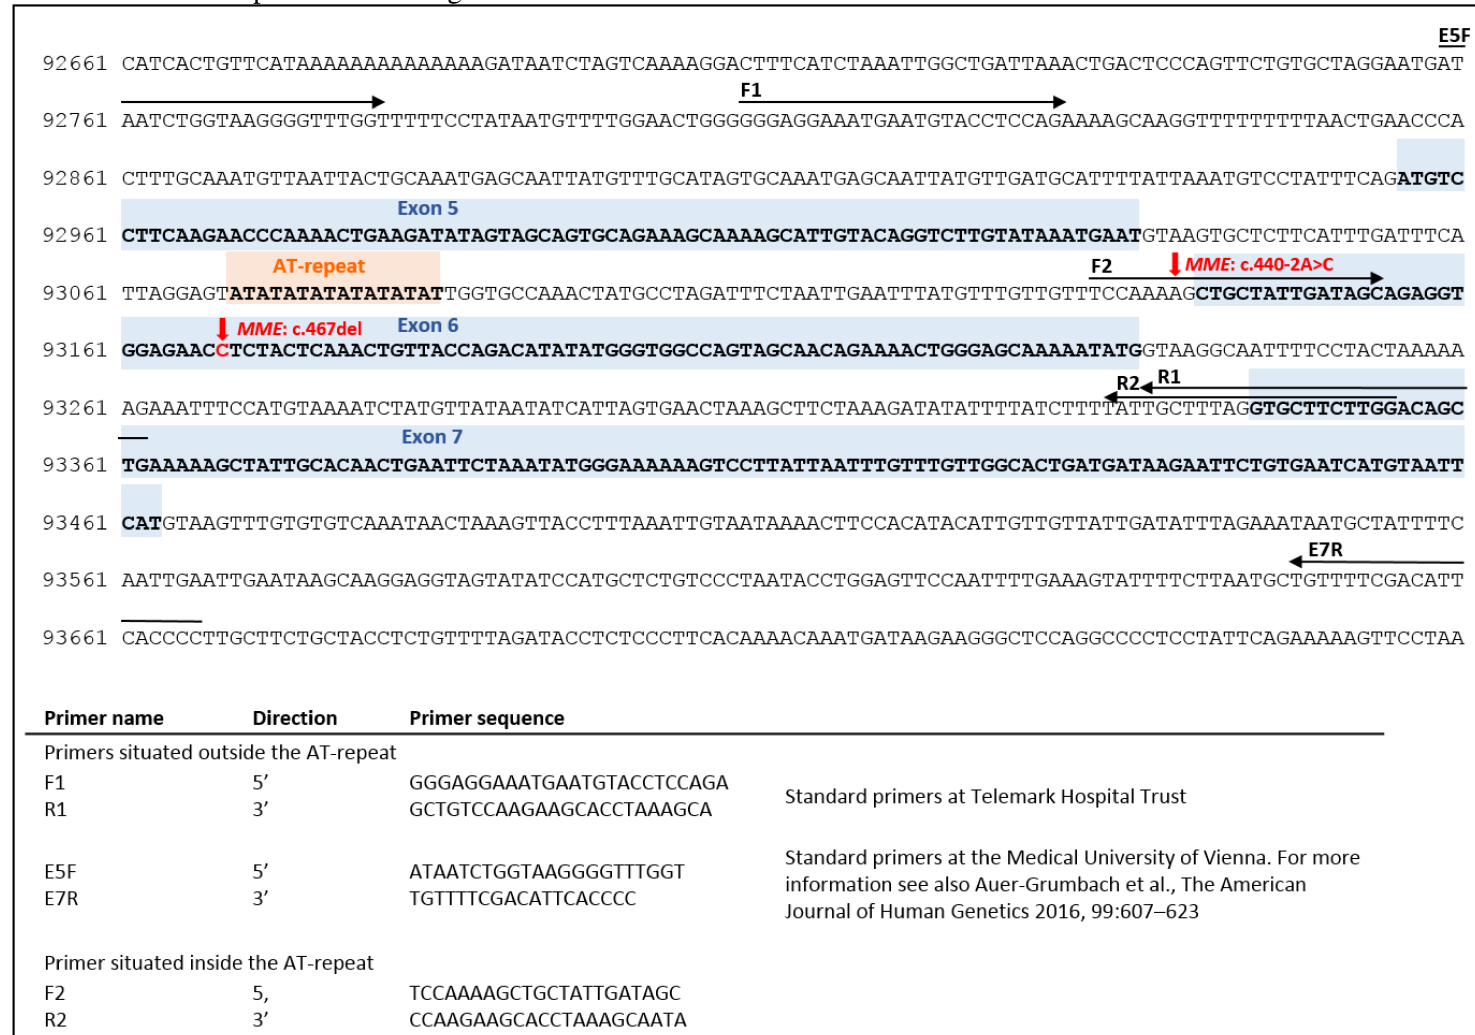

## Enzymes and conditions

## Standard Sanger sequencing conditions at Telemark Hospital Trust (top) and the Medical University of Vienna (bottom)

| PCR enzyme                                                                  | PCR primers | PCR reagents                                                                                                                                              | PCR conditions                                                               | Comment                                                                                                                                                                                                                                                                                                                                                                                                              | Result                         |
|-----------------------------------------------------------------------------|-------------|-----------------------------------------------------------------------------------------------------------------------------------------------------------|------------------------------------------------------------------------------|----------------------------------------------------------------------------------------------------------------------------------------------------------------------------------------------------------------------------------------------------------------------------------------------------------------------------------------------------------------------------------------------------------------------|--------------------------------|
| Accuprime (ThermoFischer Scientific)                                        | F1+R1       | 10x AccuPrime buffer II 1.25µl<br>Primer F 2µM 1,13µl<br>Primer R 2µM 1,13µl<br>Accuprime 2U/ul 0,25µl<br>dH <sub>2</sub> O 7.75µl<br>DNA ≈50ng/ul 1.00µl | 95°C 2min + 95°C 30s, 61°C 30s , 72°C 1min x 35 cycles + 72°C 10 min + 4°C → | Standard conditions and Telemark Hospital Trust. PCR clean-up was performed with ExoSAP IT Express, sequencing with BigDye v.3.1 Terminator Cycle Sequencing Kit and sequencing clean-up with BigDye XTerminator Purification Kit (all ThermoFischer Scientific). The products were sequenced on the ABI3130XL (Life Technologies Ltd., Paisley, UK and analysed with CLC Main Workbench (CLC bio, Aarhus, Denmark). | Allele drop-out of 13AT allele |
| Phusion Green Hot Start II High-Fidelity DNA Polymerase (Thermo Scientific) | E5F+E7R     | 2x Phusion Green MM 10.00µl<br>Primer F 1µM 0.50µl<br>Primer R 1µM 0.50µl<br>Nuclease free dH <sub>2</sub> O 8.00µl<br>DNA ≈50ng/ul 1.00µl                | 98°C 30s + 98°C 5s, 63°C 15s, 72°C 15s x 30 cycles + 72°C 5min + 4°C →       | Standard conditions at the Medical University of Vienna PCR clean-up was performed with ExoSAP IT Express, sequencing with BigDye v.3.1 Terminator Cycle Sequencing Kit and sequencing clean-up with BigDye XTerminator Purification Kit (all Thermo Scientific). The products were sequenced on the ABI3130XL and analysed with Seqscape (Life Technologies Ltd., Paisley, UK)                                      | Allele drop-out of 13AT allele |

**Ability of different PCR enzymes and conditions to amplify both the short and the long AT-repeat during Sanger sequencing.**

The testing was performed on one individual homozygous for an 8AT repeat, one homozygous for a 13AT repeat and one heterozygous for an 8AT/13AT repeat. The test was repeated once for all individuals and additionally for four individuals heterozygous for an 8AT/13AT repeat.

Sanger sequencing conditions were similar for all enzyme and conditions tested. PCR clean-up was performed with ExoSAP IT Express, sequencing with BigDye v.3.1 Terminator Cycle Sequencing Kit and sequencing clean-up with BigDye XTerminator Purification Kit (all ThermoFischer Scientific). The products were sequenced on the ABI3130XL (Life Technologies Ltd., Paisley, UK and analysed with CLC Main Workbench (CLC bio, Aarhus, Denmark).

| PCR enzyme                                                    | PCR primers | PCR reagents                                                                                                                                                                                       | PCR conditions                                                               | Comment                                                                                                          | Result                         |
|---------------------------------------------------------------|-------------|----------------------------------------------------------------------------------------------------------------------------------------------------------------------------------------------------|------------------------------------------------------------------------------|------------------------------------------------------------------------------------------------------------------|--------------------------------|
| Accuprime (ThermoFischer Scientific)                          | F1+R1       | 10x AccuPrime buffer II 1.25µl<br>Primer F 2µM 1.13µl<br>Primer R 2µM 1.13µl<br>Accuprime 2U/ul 0.25µl<br>dH <sub>2</sub> O 7.75µl<br>DNA ≈50ng/ul 1.00µl                                          | 95°C 2min + 95°C 30s, 61°C 30s , 69°C 1min x 35 cycles + 72°C 10 min + 4°C → | PCR program with 69 °C elongation temperature. Recommended from manufacturer for AT rich templates               | Allele drop-out of 13AT allele |
| Accuprime (ThermoFischer Scientific)                          | F1+R1       | 10x AccuPrime buffer II 1.25µl<br>Primer F 2µM 1.13µl<br>Primer R 2µM 1.13µl<br>3 % DMSO 0.38µl<br>Accuprime 2U/ul 0,25µl<br>dH <sub>2</sub> O 7.38µl<br>DNA ≈50ng/ul 1.00µl                       | 95°C 2min + 95°C 30s, 61°C 30s , 72°C 1min x 35 cycles + 72°C 10 min + 4°C → | PCR reaction with 3% DMSO Recommended by the manufacturer to loosen up secondary structures                      | Allele drop-out of 13AT allele |
| Platinum SuperFi II PCR Master MIX (ThermoFischer Scientific) | F1+R1       | 2x Platinum SuperFi II PCR mastermix 6.25µl<br>Primer F 2µM 2.50µl<br>Primer R 2µM 2.50µl<br>dH <sub>2</sub> O 0.25µl<br>DNA ≈50ng/ul 1.00µl                                                       | 98°C 30s + 98°C 10s, 61°C 10s , 72°C 30s x 35 cycles + 72°C 5 min + 4°C →    | PCR enzyme recommended by ThermoFischer Scientific. PCR set-up and program based on manufacture recommendations. | Allele drop-out of 13AT allele |
| Herculase II Fusion DNA pol (Agilent Technologies)            | F1+R1       | 5x herculase II buffer 2.50µl<br>Primer F 2µM 1.13µl<br>Primer R 2µM 1.13µl<br>dNTP mix, 10mM each 0.31µl<br>dH <sub>2</sub> O 3.31µl<br>Herculase II fusion DNA pol 0.13µl<br>DNA ≈50ng/ul 1.00µl | 95°C 2min + 95°C 30s, 61°C 30s , 72°C 1min x 35 cycles + 72°C 10 min + 4°C → | PCR set-up and program based on manufacture recommendations.                                                     | Allele drop-out of 13AT allele |

|                                                       |         |                                                                                                                                                                                      |                                                                                                               |                                                                                                                                                           |                                                                                                                          |                                    |
|-------------------------------------------------------|---------|--------------------------------------------------------------------------------------------------------------------------------------------------------------------------------------|---------------------------------------------------------------------------------------------------------------|-----------------------------------------------------------------------------------------------------------------------------------------------------------|--------------------------------------------------------------------------------------------------------------------------|------------------------------------|
| Q5 Hi Fidelity DNA pol (New England BioLabs)          | F1+R1   | 5x Q5 Reaction buffer<br>Primer F 2 $\mu$ M<br>Primer R 2 $\mu$ M<br>dNTP, 10mM<br>dH <sub>2</sub> O<br>Q5 HiFid DNA pol<br>DNA $\approx$ 50ng/ul                                    | 2.50 $\mu$ l<br>3.13 $\mu$ l<br>3.13 $\mu$ l<br>0.25 $\mu$ l<br>2.38 $\mu$ l<br>0.13 $\mu$ l<br>1.00 $\mu$ l  | 98 $^{\circ}$ C 30s + 98 $^{\circ}$ C 10s, 61 $^{\circ}$ C 30s , 72 $^{\circ}$ C 30s x 35 cycles + 72 $^{\circ}$ C 2 min + 4 $^{\circ}$ C $\rightarrow$   | PCR set-up and program based on manufacture recommendations.                                                             | Allele drop-out of 13AT allele     |
| OneTaq Hot Start DNA polymerase (New England BioLabs) | F1+R1   | 5x OneTaq Std Rxn buffer<br>Primer F 2 $\mu$ M<br>Primer R 2 $\mu$ M<br>dNTP, 10mM<br>dH <sub>2</sub> O<br>OneTaq Hotstart DNA pol<br>DNA $\approx$ 50ng/ul                          | 2.50 $\mu$ l<br>1.13 $\mu$ l<br>1.13 $\mu$ l<br>0.25 $\mu$ l<br>6.44 $\mu$ l<br>0.13 $\mu$ l<br>1.00 $\mu$ l  | 94 $^{\circ}$ C 30s + 94 $^{\circ}$ C 30s, 61 $^{\circ}$ C 30s , 68 $^{\circ}$ C 1min x 35 cycles + 68 $^{\circ}$ C 5 min + 4 $^{\circ}$ C $\rightarrow$  | PCR set-up and program based on manufacture recommendations.                                                             | Both 8AT and 13AT alleles detected |
| Type iT Microsatellite PCR kit (QIAGEN)               | F1+R1   | 2x Type-it PCR mix<br>Primer F 2 $\mu$ M<br>Primer R 2 $\mu$ M<br>dH <sub>2</sub> O<br>DNA $\approx$ 50ng/ul                                                                         | 6.25 $\mu$ l<br>0.63 $\mu$ l<br>0.63 $\mu$ l<br>3.00 $\mu$ l<br>1.00 $\mu$ l                                  | 95 $^{\circ}$ C 5min + 95 $^{\circ}$ C 30s, 60 $^{\circ}$ C 90s, 72 $^{\circ}$ C 30sec x 28 cycles + 60 $^{\circ}$ C 30min + 4 $^{\circ}$ C $\rightarrow$ | Enzyme used at Telemark Hospital for expansion analysis.<br>PCR set-up and program based on manufacture recommendations. | Both 8AT and 13AT alleles detected |
| Advantage GC LA Polymerase (Takara)                   | E5F+E7R | 2x GC Melt Buffer<br>dNTP-Mix (20mM each)<br>Primer F 1 $\mu$ M<br>Primer R 1 $\mu$ M<br>Nuclease free dH <sub>2</sub> O<br>LA Polymerase Mix (5U/ $\mu$ l)<br>DNA $\approx$ 50ng/ul | 12.50 $\mu$ l<br>0.50 $\mu$ l<br>1.00 $\mu$ l<br>1.00 $\mu$ l<br>8.75 $\mu$ l<br>0.25 $\mu$ l<br>1.00 $\mu$ l | 94 $^{\circ}$ C 1min + 94 $^{\circ}$ C 30s, 63 $^{\circ}$ C 30s, 72 $^{\circ}$ C 1min x 30 cycles + 72 $^{\circ}$ C 5min + 4 $^{\circ}$ C $\rightarrow$   | PCR set-up and program based on manufacturer's recommendations                                                           | Both 8AT and 13AT alleles detected |

**Fragment Analysis (FLA)**

Electrophoretic length separation of the PCR products was performed on 3130XL Genetic Analyzer (Life Technologies). Data were analyzed by GeneMarker v. 1.85 (SoftGenetics LLC).

| PCR enzyme                                       | PCR primers         | PCR reagents                                                                                                                                              | PCR conditions                                                               |
|--------------------------------------------------|---------------------|-----------------------------------------------------------------------------------------------------------------------------------------------------------|------------------------------------------------------------------------------|
| Accuprime<br>(ThermoFischer Scientific)          | F1-FAM<br>tagget+R1 | 10x AccuPrime buffer II 1.25µl<br>Primer F 2µM 1.13µl<br>Primer R 2µM 1.13µl<br>Accuprime 2U/ul 0.25µl<br>dH <sub>2</sub> O 7.75µl<br>DNA ≈50ng/ul 1.00µl | 95°C 2min + 95°C 30s, 61°C 30s , 72°C 1min x 35 cycles + 72°C 10 min + 4°C → |
| Type iT<br>Microsatellite<br>PCR kit<br>(QIAGEN) | F1-FAM<br>tagget+R1 | 2x Type-it PCR mix 6.25µl<br>Primer F 2µM 0.63µl<br>Primer R 2µM 0.63µl<br>dH <sub>2</sub> O 3.00µl<br>DNA ≈50ng/ul 1.00µl                                | 95°C 5min + 95°C 30s, 60°C 90s, 72°C 30sec x 28 cycles + 60°C 30min + 4°C →  |

**Sequence traces for MME: c.467del****Individual with one short and one long AT-repeat**

False homozygous deletion with primers outside AT-repeat

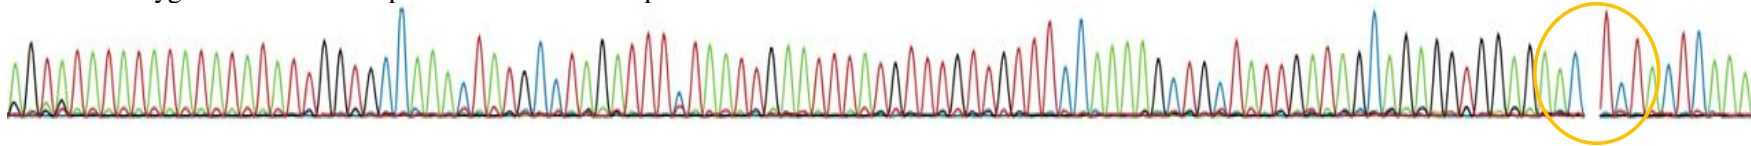

Correct heterozygous deletion with primers inside AT-repeat

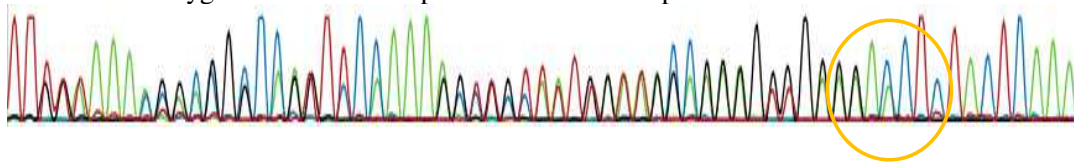**Individual with two short AT-repeats**

Correct heterozygous deletion with primers outside AT-repeat

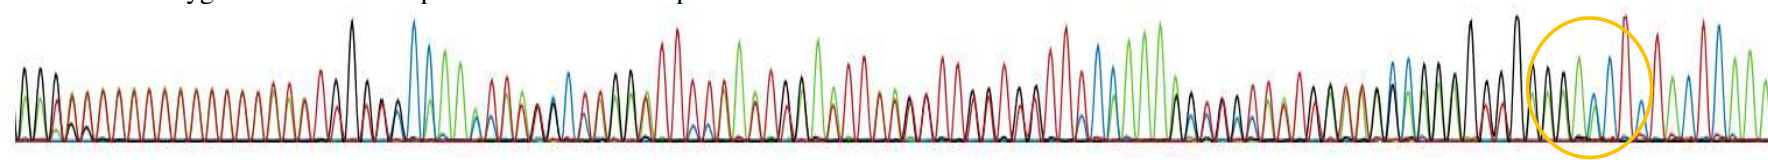

Correct heterozygous deletion with primers inside AT-repeat

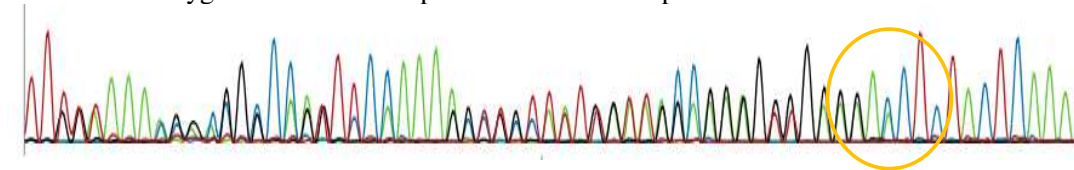



**Sequence traces for *MME*: c.440-2A>C****Individual with one short and one long AT-repeat**

False wildtype with primers outside AT-repeat

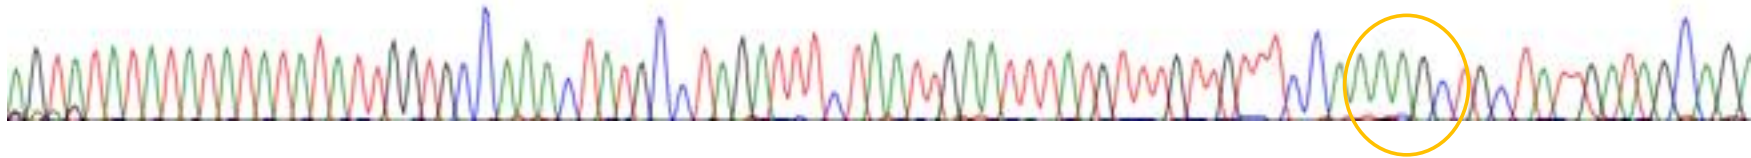

Correct heterozygous missense variant with primers inside AT-repeat

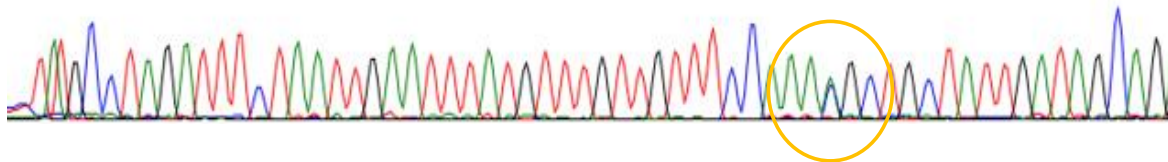**Individual with two long AT-repeats**

Correct heterozygous with primers outside AT-repeat

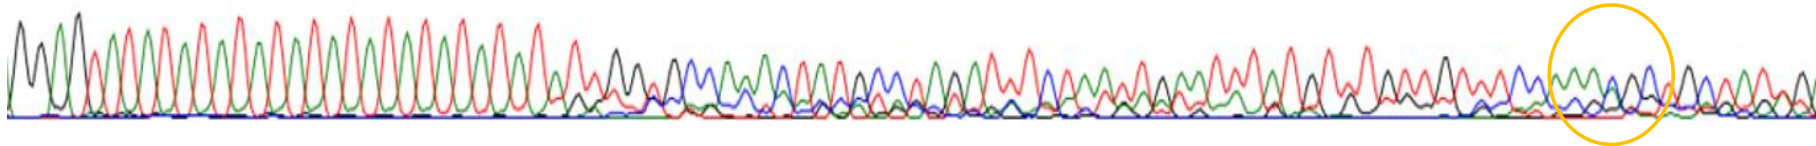

Correct heterozygous with primers inside AT-repeat

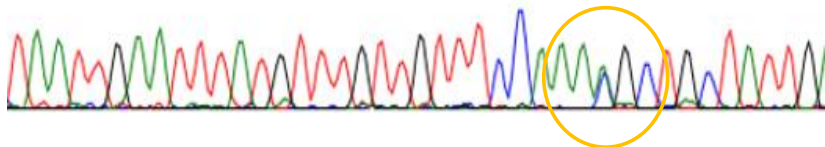

Supplement: jmedgenet-2021-108281supp001_data_supplement.pdf [file jmedgenet-2021-108281supp001_data_supplement.pdf]
